# Supplementary material
Source: HighWire-hosted journal article supplement (https://openres.ersjournals.com/content/9/2/00332-2022)
Supplement: inline-supplementary-material-1 [file inline-supplementary-material-1.pdf]

## Supplemental Data

**Figure 1S (Supplement):** Heatmap of metabolite expression in plasma. Columns reflect samples and rows reflect metabolites. The metabolites are ordered by the direction and magnitude of their correlation with FEV1pp.

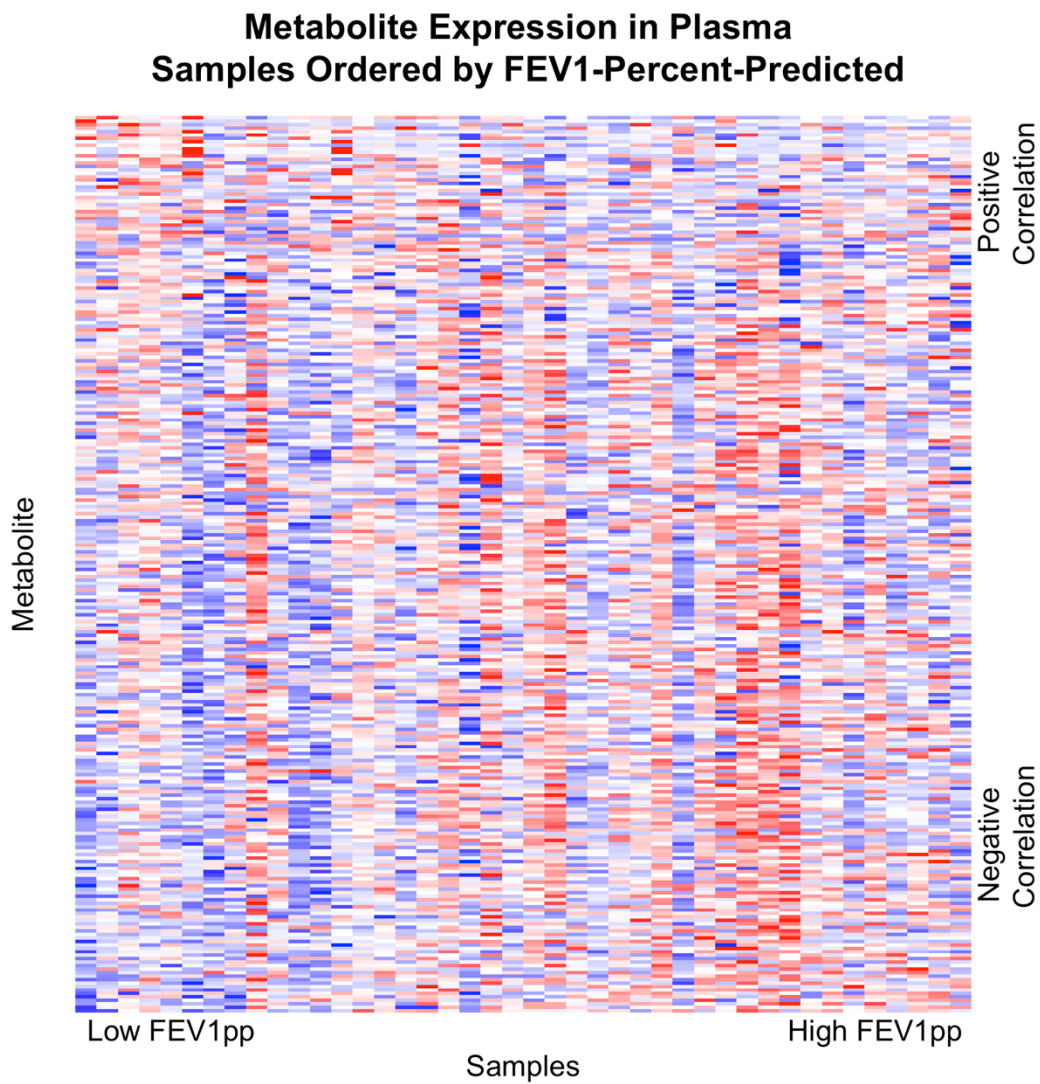

**Table 1S (Supplement):** Top 10 pathways based on the proteins significantly correlated with FEV1pp at the 0.05 level under a permutation testing framework. The column names are: # Overlapping Genes lists the number of significant proteins in our dataset that belonged to each pathway; # All Pathway Genes lists the total number of proteins in our dataset that belong to each pathway and in parentheses is given the total number of proteins in that pathway; P-Value gives the overrepresentation p-value; and Q-Value gives the false-discovery rate adjusted p-value for each pathway.

| <b>Pathway</b>                                                  | <b>Source</b> | <b>#<br/>Overlapping<br/>Genes</b> | <b># All Pathway<br/>Genes</b> | <b>P-Value</b> | <b>Q-Value</b> |
|-----------------------------------------------------------------|---------------|------------------------------------|--------------------------------|----------------|----------------|
| <i>EPH-Ephrin signaling</i>                                     | Reactome      | 25                                 | 39 (74)                        | 0.000125       | 0.434          |
| <i>Ephrin signaling</i>                                         | Reactome      | 11                                 | 13 (19)                        | 0.000274       | 0.434          |
| <i>Salivary secretion -<br/>Homo sapiens (human)</i>            | KEGG          | 20                                 | 30 (93)                        | 0.000278       | 0.434          |
| <i>Sema3A PAK dependent<br/>Axon repulsion</i>                  | Reactome      | 7                                  | 7 (16)                         | 0.000549       | 0.642          |
| <i>Post-translational<br/>protein modification</i>              | Reactome      | 167                                | 405 (1425)                     | 0.001040       | 0.918          |
| <i>Class B/2 (Secretin<br/>family receptors)</i>                | Reactome      | 15                                 | 22 (91)                        | 0.001180       | 0.918          |
| <i>Splicing factor NOVA<br/>regulated synaptic<br/>proteins</i> | Wikipathways  | 9                                  | 11 (42)                        | 0.001690       | 1.000          |
| <i>EPHB forward signaling</i>                                   | PID           | 14                                 | 21 (39)                        | 0.002400       | 1.000          |
| <i>VEGFA-VEGFR2<br/>Signaling Pathway</i>                       | Wikipathways  | 74                                 | 166 (433)                      | 0.003000       | 1.000          |

*Lysosome - Homo sapiens (human)*

KEGG

27

50 (128)

0.003040

**Table 2S (Supplement):** Top 10 proteins correlated with FEV1/FVC. Proteins are ordered based on FDR-adjusted p-values from permutation testing with the Pearson correlation test. Correlation was calculated by averaging the correlation across all aptamers that map to each protein.

| <b>Protein</b>   | <b>UniProt ID</b> | <b>Average Correlation</b> | <b>Permutation P-Value</b> | <b>Q-Value</b> |
|------------------|-------------------|----------------------------|----------------------------|----------------|
| <i>OCRL</i>      | Q01968            | -0.5813986                 | 0.0001000                  | 0.0019753      |
| <i>CUL3</i>      | Q13618            | -0.5740182                 | 0.0001000                  | 0.0019753      |
| <i>NFL</i>       | P07196            | -0.6217485                 | 0.0001000                  | 0.0019753      |
| <i>TM190</i>     | Q8WZ59            | -0.5814013                 | 0.0001000                  | 0.0019753      |
| <i>RASN</i>      | P01111            | -0.6181181                 | 0.0001000                  | 0.0019753      |
| <i>PXDC2:ECD</i> | Q6UX71            | 0.5717866                  | 0.0001000                  | 0.0019753      |
| <i>megalin</i>   | P98164            | -0.5534422                 | 0.0001000                  | 0.0019753      |
| <i>Serpin B1</i> | P30740            | -0.5748941                 | 0.0001000                  | 0.0019753      |
| <i>STX8</i>      | Q9UNK0            | -0.5168538                 | 0.0001000                  | 0.0019753      |
| <i>NRG3</i>      | P56975            | 0.4639801                  | 0.0001000                  | 0.0019753      |

**Table 3S (Supplement):** Top 10 proteins correlated with DLCO-percent-predicted. Proteins are ordered based on FDR-adjusted p-values from permutation testing with the Pearson correlation test. Correlation was calculated by averaging the correlation across all aptamers that map to each protein.

| <b>Protein</b>               | <b>UniProt ID</b> | <b>Average Correlation</b> | <b>Permutation P-Value</b> | <b>Q-Value</b> |
|------------------------------|-------------------|----------------------------|----------------------------|----------------|
| <i>NRG3</i>                  | P56975            | 0.6242945                  | 0.0001000                  | 0.3871613      |
| <i>Testican-2</i>            | Q92563            | 0.5712197                  | 0.0002000                  | 0.3871613      |
| <i>CNTN3</i>                 | Q9P232            | 0.5254836                  | 0.0005000                  | 0.3871613      |
| <i>DAF</i>                   | P08174            | 0.5159539                  | 0.0005000                  | 0.3871613      |
| <i>CNTN6</i>                 | Q9UQ52            | 0.5085081                  | 0.0005000                  | 0.3871613      |
| <i>Caspase-14</i>            | P31944            | 0.5201442                  | 0.0005999                  | 0.3871613      |
| <i>Nectin-like protein 2</i> | Q9BY67            | 0.4933851                  | 0.0010999                  | 0.6083963      |
| <i>Butyrophilin 1A1</i>      | Q13410            | 0.4831189                  | 0.0016998                  | 0.6843036      |
| <i>B3GN2</i>                 | Q9NY97            | 0.4686611                  | 0.0019998                  | 0.6843036      |
| <i>FLRT3:ECD</i>             | Q9NZU0            | 0.4629704                  | 0.0022998                  | 0.6843036      |

**Table 3S (Supplement):** Demographics of the two K-means clusters determined by BALF metabolite expression. Single asterisk (\*) indicates significant differences between clusters at 0.05 level.

|                            | <b>Cluster 1<br/>(N=10)</b> | <b>Cluster 2<br/>(N=42)</b> | <b>Total<br/>(N=52)</b> |
|----------------------------|-----------------------------|-----------------------------|-------------------------|
| <b>Sex</b>                 |                             |                             |                         |
| <i>Male</i>                | 9 (90.0%)                   | 29 (69.0%)                  | 38 (73.1%)              |
| <i>Female</i>              | 1 (10.0%)                   | 13 (31.0%)                  | 14 (26.9%)              |
| <b>Age*</b>                |                             |                             |                         |
| <i>Mean (SD)</i>           | 62.6 (8.78)                 | 55.3 (7.78)                 | 56.7 (8.41)             |
| <i>Median [Min, Max]</i>   | 62.5 [49.0, 76.0]           | 55.0 [42.0, 80.0]           | 56.0 [42.0, 80.0]       |
| <b>Ethnicity</b>           |                             |                             |                         |
| <i>Black, Non-Hispanic</i> | 7 (70.0%)                   | 21 (50.0%)                  | 28 (53.8%)              |

|                                |                      |                      |                      |
|--------------------------------|----------------------|----------------------|----------------------|
| <i>White, Hispanic/Latino</i>  | 2 (20.0%)            | 21 (50.0%)           | 23 (44.2%)           |
| <i>Asian/Pacific Islander</i>  | 1 (10.0%)            | 0 (0%)               | 1 (1.9%)             |
| <b>Smoker*</b>                 |                      |                      |                      |
| Yes                            | 3 (30.0%)            | 25 (59.5%)           | 28 (53.8%)           |
| Former                         | 7 (70.0%)            | 9 (21.4%)            | 16 (30.8%)           |
| Never                          | 0 (0%)               | 8 (19.0%)            | 8 (15.4%)            |
| <b>Pack Years</b>              |                      |                      |                      |
| Mean (SD)                      | 31.8 (22.4)          | 21.1 (23.5)          | 23.1 (23.4)          |
| Median [Min, Max]              | 30.7 [5, 80]         | 15.2 [0, 120]        | 17.2 [0, 120]        |
| <b>Receiving ART</b>           |                      |                      |                      |
| Yes                            | 9 (90.0%)            | 39 (92.9%)           | 48 (92.3%)           |
| No                             | 1 (10.0%)            | 3 (7.1%)             | 4 (7.7%)             |
| <b>Viral Load</b>              |                      |                      |                      |
| <50 Copies                     | 2 (20.0%)            | 28 (66.7%)           | 30 (57.7%)           |
| >50 Copies                     | 1 (10.0%)            | 4 (9.5%)             | 5 (9.6%)             |
| Missing                        | 7 (70.0%)            | 10 (23.8%)           | 17 (32.7%)           |
| <b>FEV1-Percent-Predicted*</b> |                      |                      |                      |
| Mean (SD)                      | 68.7 (27.0)          | 89.9 (19.6)          | 85.8 (22.6)          |
| Median [Min, Max]              | 68.7 [21.0, 108]     | 89.4 [46.7, 128]     | 86.2 [21.0, 128]     |
| <b>FEV1*</b>                   |                      |                      |                      |
| Mean (SD)                      | 2.12 (0.844)         | 2.79 (0.867)         | 2.66 (0.896)         |
| Median [Min, Max]              | 2.002 [0.650, 0.362] | 2.75 [1.32, 4.77]    | 2.59 [0.650, 4.77]   |
| <b>FEV1/FVC</b>                |                      |                      |                      |
| Mean (SD)                      | 0.558 (0.201)        | 0.704 (0.122)        | 0.676 (0.15)         |
| Median [Min, Max]              | 0.546 [0.293, 0.825] | 0.705 [0.413, 0.905] | 0.684 [0.293, 0.905] |
| <b>Case-Control Status</b>     |                      |                      |                      |
| Case                           | 7 (70.0%)            | 19 (45.2%)           | 26 (50.0%)           |
| Control                        | 3 (30.0%)            | 23 (54.8%)           | 26 (50.0%)           |
| <b>DLCO-Percent-Predicted</b>  |                      |                      |                      |
| Mean (SD)                      | 63.6 (20.4)          | 76.0 (25.0)          | 74.2 (24.6)          |
| Median [Min, Max]              | 59.0 [43.0, 98.2]    | 75.0 [14.4, 139]     | 74.5 [14.4, 139]     |
| Missing                        | 4 (40.0%)            | 7 (16.7%)            | 11 (21.2%)           |

**Table 4S (Supplement):** Top 10 BALF metabolites differentially expressed between two K-means clusters determined by metabolite expression. A positive test statistic implies average metabolite expression was higher in Cluster 1 compared to Cluster 2.

| <i>Metabolite</i>  | <i>Test Statistic</i> | <i>P-Value</i> | <i>Q-Value</i> |
|--------------------|-----------------------|----------------|----------------|
| <i>Asn</i>         | -9.5122472            | 0.0000000      | 0.0000000      |
| <i>AC(12:0)</i>    | 8.5161455             | 0.0000001      | 0.0000157      |
| <i>AC(4:1-DC)</i>  | 8.8476460             | 0.0000008      | 0.0000450      |
| <i>AC(5:0)</i>     | 9.5827866             | 0.0000007      | 0.0000450      |
| <i>AC(6:0-DC)</i>  | 8.1804113             | 0.0000009      | 0.0000450      |
| <i>AC(5:1)</i>     | 9.1026218             | 0.0000014      | 0.0000580      |
| <i>CE(17:0)</i>    | 8.1085759             | 0.0000023      | 0.0000810      |
| <i>AC(5:0-DC)</i>  | 7.2955463             | 0.0000026      | 0.0000833      |
| <i>AC(4:0-DC)</i>  | 7.6018715             | 0.0000047      | 0.0001309      |
| <i>AC(14:0-OH)</i> | 7.4445988             | 0.0000072      | 0.0001809      |

**Table 5S (Supplement):** Demographics of the six overlapping individuals between smaller clusters determined by the BALF proteome and the BALF metabolome. Single asterisk (\*) indicates significant differences between clusters at 0.05 level. Double asterisk (\*\*) indicates significant differences between clusters at the 0.005 level.

|                        | <i>Overlapping<br/>(N=6)</i> | <i>Non-Overlapping<br/>(N=46)</i> | <i>Total<br/>(N=52)</i> |
|------------------------|------------------------------|-----------------------------------|-------------------------|
| <b>Sex</b>             |                              |                                   |                         |
| Male                   | 6 (100%)                     | 32 (69.6%)                        | 38 (73.1%)              |
| Female                 | 0 (0%)                       | 14 (30.4%)                        | 14 (26.9%)              |
| <b>Age</b>             |                              |                                   |                         |
| Mean (SD)              | 65.7 (9.71)                  | 55.5 (7.58)                       | 56.7 (8.41)             |
| Median [Min, Max]      | 67.5 [49.0, 76.0]            | 55.0 [42.0, 80.0]                 | 56.0 [42.0, 80.0]       |
| <b>Ethnicity*</b>      |                              |                                   |                         |
| Black, Non-Hispanic    | 6 (100%)                     | 22 (47.8%)                        | 28 (53.8%)              |
| White, Hispanic/Latino | 0 (0%)                       | 23 (50.0%)                        | 23 (44.2%)              |
| Asian/Pacific Islander | 0 (0%)                       | 1 (2.2%)                          | 1 (1.9%)                |
| <b>Smoking Status</b>  |                              |                                   |                         |

|                                 |                      |                      |                      |
|---------------------------------|----------------------|----------------------|----------------------|
| Yes                             | 2 (33.3%)            | 26 (56.5%)           | 28 (53.8%)           |
| Former                          | 4 (66.7%)            | 12 (26.1%)           | 16 (30.8%)           |
| Never                           | 0 (0%)               | 8 (17.4%)            | 8 (15.4%)            |
| <b>Pack Years</b>               |                      |                      |                      |
| Mean (SD)                       | 37.7 (26.7)          | 21.3 (22.6)          | 23.1 (23.4)          |
| Median [Min, Max]               | 32.5 [5.00, 80.0]    | 16.2 [0, 120]        | 17.2 [0, 120]        |
| <b>Receiving ART</b>            |                      |                      |                      |
| Yes                             | 5 (83.3%)            | 43 (93.5%)           | 48 (92.3%)           |
| No                              | 1 (16.7%)            | 3 (6.5%)             | 4 (7.7%)             |
| <b>Viral Load</b>               |                      |                      |                      |
| <50 Copies                      |                      | 30 (65.2%)           | 30 (57.7%)           |
| >50 Copies                      |                      | 5 (10.9%)            | 5 (9.6%)             |
| Missing                         | 6 (100%)             | 11 (23.9%)           | 17 (32.7%)           |
| <b>FEV1-Percent-Predicted**</b> |                      |                      |                      |
| Mean (SD)                       | 51.8 (18.9)          | 90.3 (19.0)          | 85.8 (22.6)          |
| Median [Min, Max]               | 52.7 [21.0, 79.2]    | 89.9 [46.7, 128]     | 86.2 [21.0, 128]     |
| <b>FEV1**</b>                   |                      |                      |                      |
| Mean (SD)                       | 1.66 (0.608)         | 2.79 (0.846)         | 2.66 (0.896)         |
| Median [Min, Max]               | 1.70 [0.650, 2.54]   | 2.75 [1.32, 4.77]    | 2.59 [0.650, 4.77]   |
| <b>FEV1/FVC**</b>               |                      |                      |                      |
| Mean (SD)                       | 0.430 (0.125)        | 0.708 (0.121)        | 0.676 (0.150)        |
| Median [Min, Max]               | 0.437 [0.293, 0.599] | 0.722 [0.413, 0.905] | 0.684 [0.293, 0.905] |
| <b>DLCO-Percent Predicted</b>   |                      |                      |                      |
| Mean (SD)                       | 49.0 (8.49)          | 75.7 (24.5)          | 74.2 (24.6)          |
| Median [Min, Max]               | 49.0 [43.0, 55.0]    | 74.9 [14.4, 139]     | 74.5 [14.4, 139]     |
| Missing                         | 4 (66.7%)            | 7 (15.2%)            | 11 (21.2%)           |
| <b>Case-Control Status*</b>     |                      |                      |                      |
| Case                            | 6 (100%)             | 20 (43.5%)           | 26 (50.0%)           |
| Control                         | 0 (0%)               | 26 (56.5%)           | 26 (50.0%)           |
